# Supplementary material for: BC-miR: Monitoring Breast Cancer-Related miRNA Profile in Blood Sera—A Prosperous Approach for Tumor Detection
Source: MDPI journal article supplement (doi:10.3390/cells11172721), 2022-08-31
Supplement: s1 [file s1]

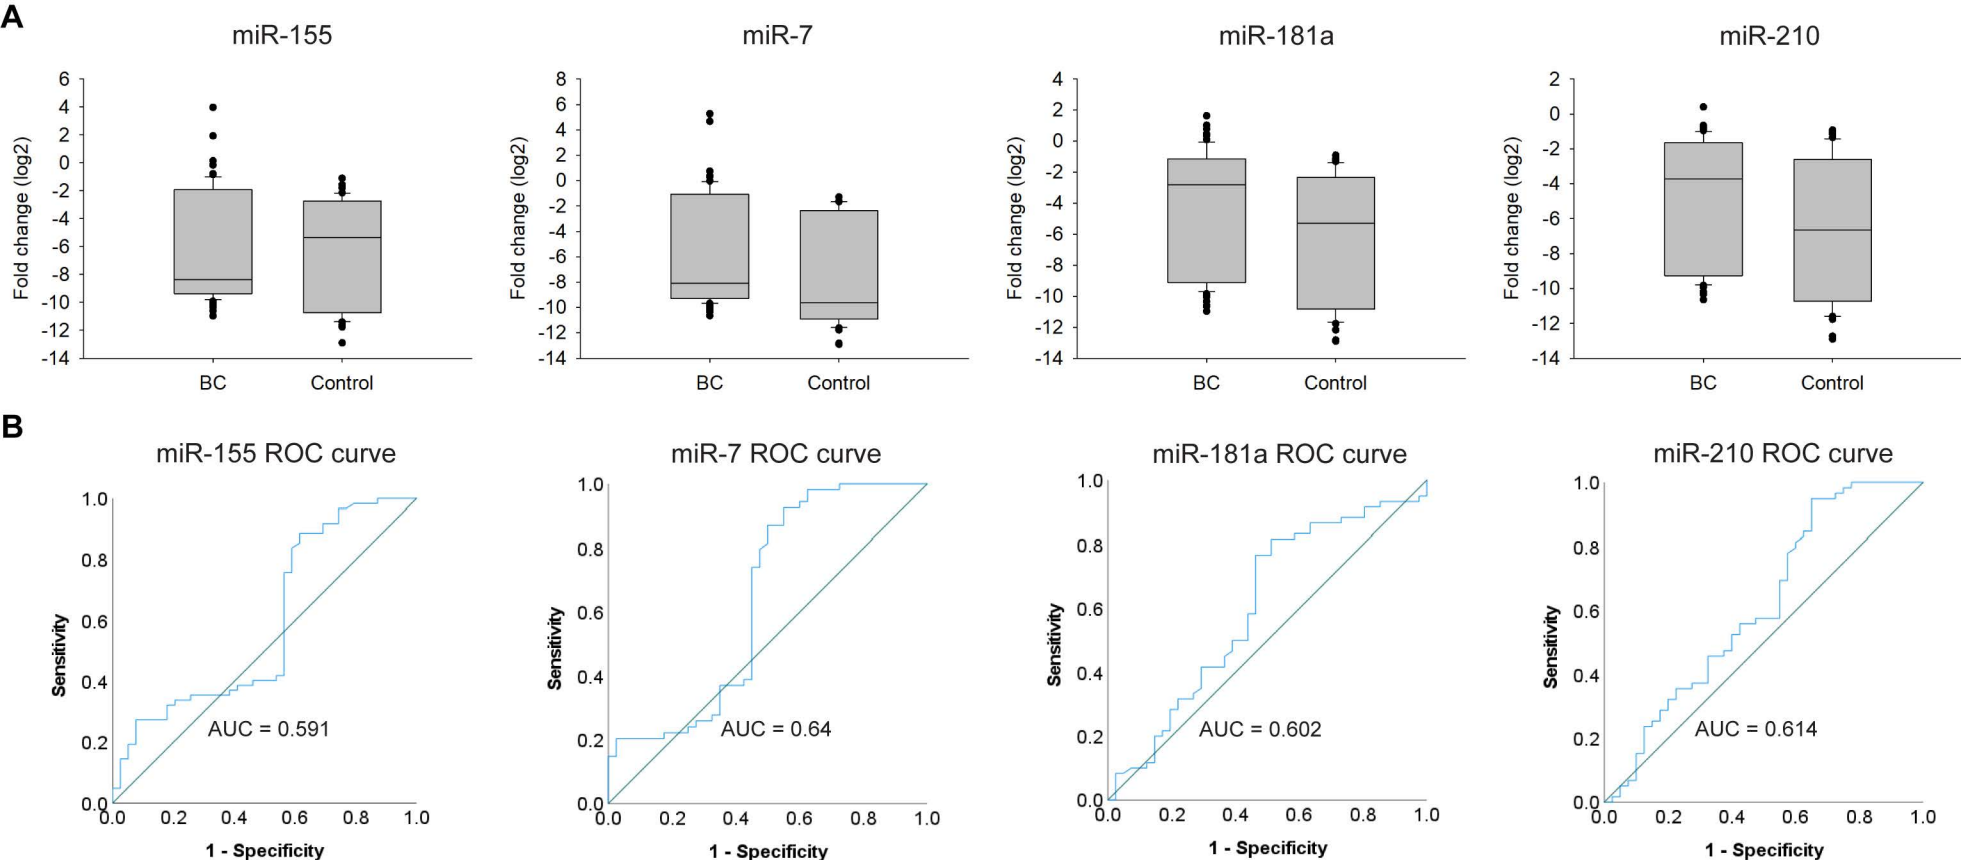

**Figure S1 Fold change (log2) and ROC curve analysis of non-significant individual miRNAs expression in BC patients (BC) compared with healthy individuals (Control).** **A)** Expressional analyses of non-significant miRNAs (miR-7, miR-155, miR-181a, and miR-210); **B)** ROC curves, and the related AUC (area under the receiver-operating characteristic curve) values of non-significant miRNAs (miR-7, miR-155, miR-181a, and miR-210). Error bars represent the standard deviation of each miRNA measured on either the group of BC patients (BC) or healthy individuals (Control).

## Correlations

|         |                     | miR125b | miR613 | miR21  | miR16  | miR15a | miR136 | miR519d | miR135b | miR200c | miR181a | miR221 | miR200a | miR210 | miR155 | miR7   |
|---------|---------------------|---------|--------|--------|--------|--------|--------|---------|---------|---------|---------|--------|---------|--------|--------|--------|
| miR125b | Pearson Correlation | 1       | -.111  | .319** | .476** | .437** | .092   | .259*   | .406**  | .256*   | .164    | .268*  | .197    | .227*  | -.001  | .182   |
|         | Sig. (2-tailed)     |         | .308   | .002   | <.001  | <.001  | .391   | .013    | <.001   | .014    | .132    | .010   | .065    | .039   | .989   | .108   |
|         | N                   | 91      | 87     | 91     | 91     | 91     | 89     | 91      | 90      | 91      | 86      | 91     | 88      | 83     | 85     | 79     |
| miR613  | Pearson Correlation | -.111   | 1      | -.017  | -.172  | -.199* | .272** | .061    | .215*   | .107    | .048    | -.070  | .010    | .028   | -.071  | .065   |
|         | Sig. (2-tailed)     | .308    |        | .864   | .082   | .044   | .006   | .540    | .030    | .284    | .639    | .484   | .924    | .791   | .487   | .543   |
|         | N                   | 87      | 103    | 101    | 103    | 103    | 100    | 103     | 102     | 103     | 97      | 102    | 99      | 95     | 97     | 90     |
| miR21   | Pearson Correlation | .319**  | -.017  | 1      | .548** | .626** | .052   | -.112   | .346**  | .371**  | .543**  | .805** | .289**  | .122   | .452** | .405** |
|         | Sig. (2-tailed)     | .002    | .864   |        | <.001  | <.001  | .602   | .254    | <.001   | <.001   | <.001   | <.001  | .003    | .234   | <.001  | <.001  |
|         | N                   | 91      | 101    | 105    | 105    | 105    | 102    | 105     | 104     | 105     | 100     | 104    | 101     | 97     | 99     | 92     |
| miR16   | Pearson Correlation | .476**  | -.172  | .548** | 1      | .921** | -.155  | .100    | .279**  | .345**  | .474**  | .548** | .387**  | .257*  | .257** | .369** |
|         | Sig. (2-tailed)     | <.001   | .082   | <.001  |        | <.001  | .116   | .303    | .004    | <.001   | <.001   | <.001  | <.001   | .010   | .009   | <.001  |
|         | N                   | 91      | 103    | 105    | 107    | 107    | 104    | 107     | 106     | 107     | 101     | 106    | 103     | 99     | 101    | 94     |
| miR15a  | Pearson Correlation | .437**  | -.199* | .626** | .921** | 1      | -.130  | .059    | .276**  | .383**  | .430**  | .647** | .423**  | .275** | .341** | .404** |
|         | Sig. (2-tailed)     | <.001   | .044   | <.001  | <.001  |        | .189   | .549    | .004    | <.001   | <.001   | <.001  | <.001   | .006   | <.001  | <.001  |
|         | N                   | 91      | 103    | 105    | 107    | 107    | 104    | 107     | 106     | 107     | 101     | 106    | 103     | 99     | 101    | 94     |
| miR136  | Pearson Correlation | .092    | .272** | .052   | -.155  | -.130  | 1      | .168    | .059    | .105    | .197    | .135   | .050    | -.083  | .088   | .158   |
|         | Sig. (2-tailed)     | .391    | .006   | .602   | .116   | .189   |        | .088    | .553    | .288    | .051    | .173   | .624    | .422   | .384   | .133   |
|         | N                   | 89      | 100    | 102    | 104    | 104    | 104    | 104     | 103     | 104     | 98      | 103    | 100     | 96     | 99     | 92     |
| miR519d | Pearson Correlation | .259*   | .061   | -.112  | .100   | .059   | .168   | 1       | .345**  | .199*   | .103    | -.047  | .123    | .160   | -.177  | -.194  |
|         | Sig. (2-tailed)     | .013    | .540   | .254   | .303   | .549   | .088   |         | <.001   | .040    | .304    | .631   | .217    | .114   | .076   | .061   |
|         | N                   | 91      | 103    | 105    | 107    | 107    | 104    | 107     | 106     | 107     | 101     | 106    | 103     | 99     | 101    | 94     |
| miR135b | Pearson Correlation | .406**  | .215*  | .346** | .279** | .276** | .059   | .345**  | 1       | .317**  | .206*   | .273** | .352**  | .311** | .024   | .014   |
|         | Sig. (2-tailed)     | <.001   | .030   | <.001  | .004   | .004   | .553   | <.001   |         | <.001   | .039    | .005   | <.001   | .002   | .810   | .898   |
|         | N                   | 90      | 102    | 104    | 106    | 106    | 103    | 106     | 106     | 106     | 100     | 105    | 102     | 98     | 100    | 93     |
| miR200c | Pearson Correlation | .256*   | .107   | .371** | .345** | .383** | .105   | .199*   | .317**  | 1       | .296**  | .382** | .399**  | .115   | .132   | .234*  |
|         | Sig. (2-tailed)     | .014    | .284   | <.001  | <.001  | <.001  | .288   | .040    | <.001   |         | .003    | <.001  | <.001   | .258   | .188   | .023   |
|         | N                   | 91      | 103    | 105    | 107    | 107    | 104    | 107     | 106     | 107     | 101     | 106    | 103     | 99     | 101    | 94     |
| miR181a | Pearson Correlation | .164    | .048   | .543** | .474** | .430** | .197   | .103    | .206*   | .296**  | 1       | .630** | .199    | .189   | .297** | .197   |
|         | Sig. (2-tailed)     | .132    | .639   | <.001  | <.001  | <.001  | .051   | .304    | .039    | .003    |         | <.001  | .051    | .068   | .004   | .066   |
|         | N                   | 86      | 97     | 100    | 101    | 101    | 98     | 101     | 100     | 101     | 101     | 100    | 97      | 94     | 95     | 88     |
| miR221  | Pearson Correlation | .268*   | -.070  | .805** | .548** | .647** | .135   | -.047   | .273**  | .382**  | .630**  | 1      | .399**  | .163   | .494** | .323** |
|         | Sig. (2-tailed)     | .010    | .484   | <.001  | <.001  | <.001  | .173   | .631    | .005    | <.001   | <.001   |        | <.001   | .108   | <.001  | .002   |
|         | N                   | 91      | 102    | 104    | 106    | 106    | 103    | 106     | 105     | 106     | 100     | 106    | 102     | 98     | 100    | 93     |
| miR200a | Pearson Correlation | .197    | .010   | .289** | .387** | .423** | .050   | .123    | .352**  | .399**  | .199    | .399** | 1       | .287** | .091   | .264*  |
|         | Sig. (2-tailed)     | .065    | .924   | .003   | <.001  | <.001  | .624   | .217    | <.001   | <.001   | .051    | <.001  |         | .004   | .374   | .011   |
|         | N                   | 88      | 99     | 101    | 103    | 103    | 100    | 103     | 102     | 103     | 97      | 102    | 103     | 97     | 98     | 92     |
| miR210  | Pearson Correlation | .227*   | .028   | .122   | .257*  | .275** | -.083  | .160    | .311**  | .115    | .189    | .163   | .287**  | 1      | -.070  | .211*  |
|         | Sig. (2-tailed)     | .039    | .791   | .234   | .010   | .006   | .422   | .114    | .002    | .258    | .068    | .108   | .004    |        | .497   | .049   |
|         | N                   | 83      | 95     | 97     | 99     | 99     | 96     | 99      | 98      | 99      | 94      | 98     | 97      | 99     | 95     | 88     |
| miR155  | Pearson Correlation | -.001   | -.071  | .452** | .257** | .341** | .088   | -.177   | .024    | .132    | .297**  | .494** | .091    | -.070  | 1      | .349** |
|         | Sig. (2-tailed)     | .989    | .487   | <.001  | .009   | <.001  | .384   | .076    | .810    | .188    | .004    | <.001  | .374    | .497   |        | <.001  |
|         | N                   | 85      | 97     | 99     | 101    | 101    | 99     | 101     | 100     | 101     | 95      | 100    | 98      | 95     | 101    | 90     |
| miR7    | Pearson Correlation | .182    | .065   | .405** | .369** | .404** | .158   | -.194   | .014    | .234*   | .197    | .323** | .264*   | .211*  | .349** | 1      |
|         | Sig. (2-tailed)     | .108    | .543   | <.001  | <.001  | <.001  | .133   | .061    | .898    | .023    | .066    | .002   | .011    | .049   | <.001  |        |
|         | N                   | 79      | 90     | 92     | 94     | 94     | 92     | 94      | 93      | 94      | 88      | 93     | 92      | 88     | 90     | 94     |

\*\*. Correlation is significant at the 0.01 level (2-tailed).

\*. Correlation is significant at the 0.05 level (2-tailed).

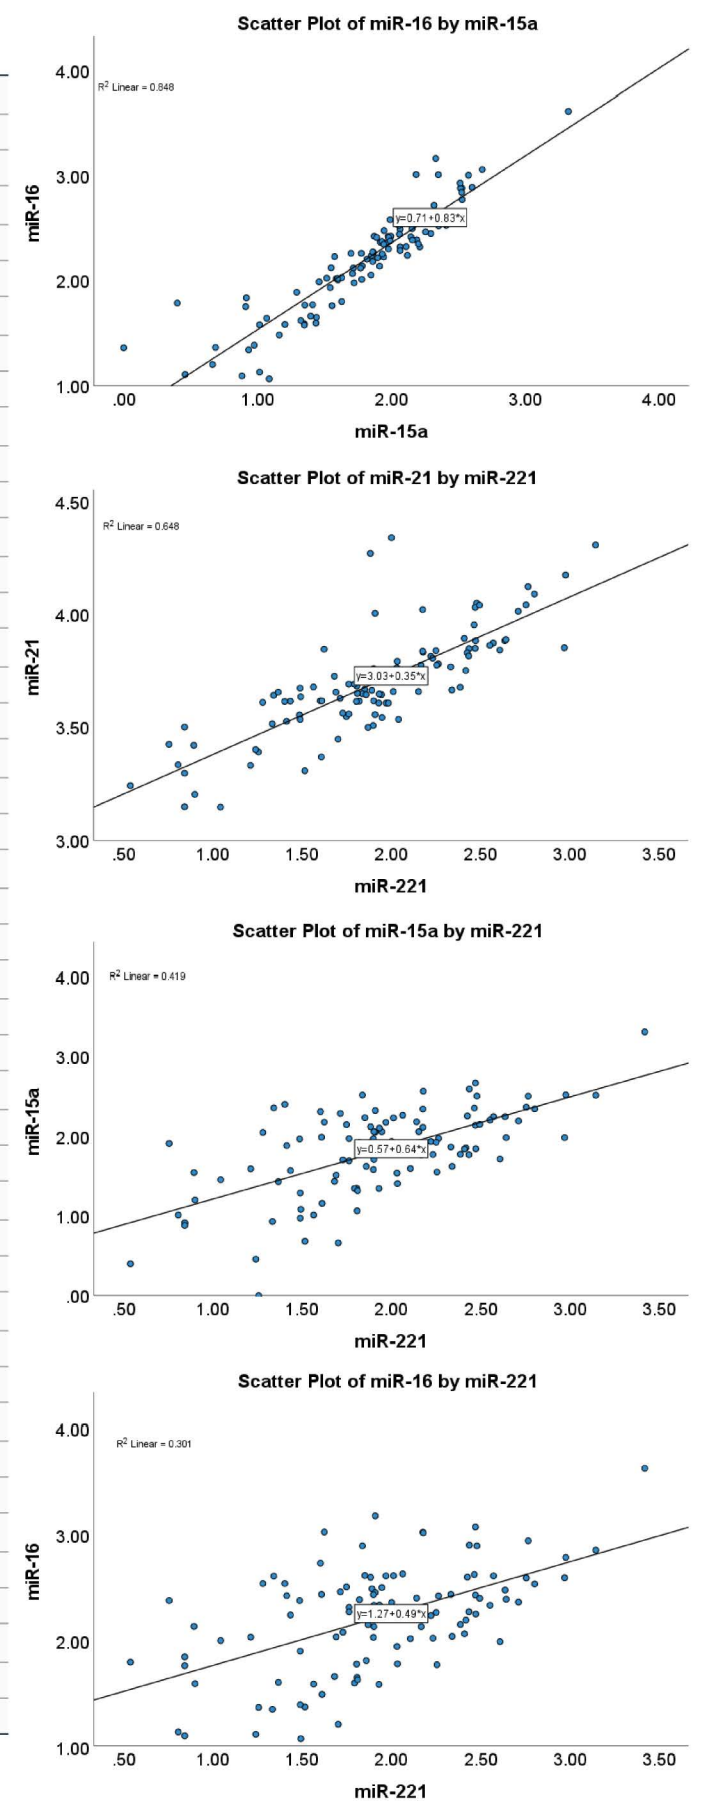

**Figure S2 Pearson correlation analysis performed on all the desired miRNAs.** Pearson correlation coefficient, p- and n-values are depicted in the correlation table. Scatter plots display the mostly correlated miRNAs, including miR-15a–miR-16, miR-21–miR-221, miR-15a–miR-221, and miR-16–miR-221.

## Correlations

|              |                     | miR21_miR21        | miR16_miR15a       |
|--------------|---------------------|--------------------|--------------------|
| miR21_miR221 | Pearson Correlation | 1                  | .606 <sup>**</sup> |
|              | Sig. (2-tailed)     |                    | <.001              |
|              | N                   | 213                | 212                |
| miR16_miR15a | Pearson Correlation | .606 <sup>**</sup> | 1                  |
|              | Sig. (2-tailed)     | <.001              |                    |
|              | N                   | 212                | 213                |

<sup>\*\*</sup>. Correlation is significant at the 0.01 level (2-tailed).

**Scatter Plot of miR-21–miR-16 by miR-15a–miR-221**

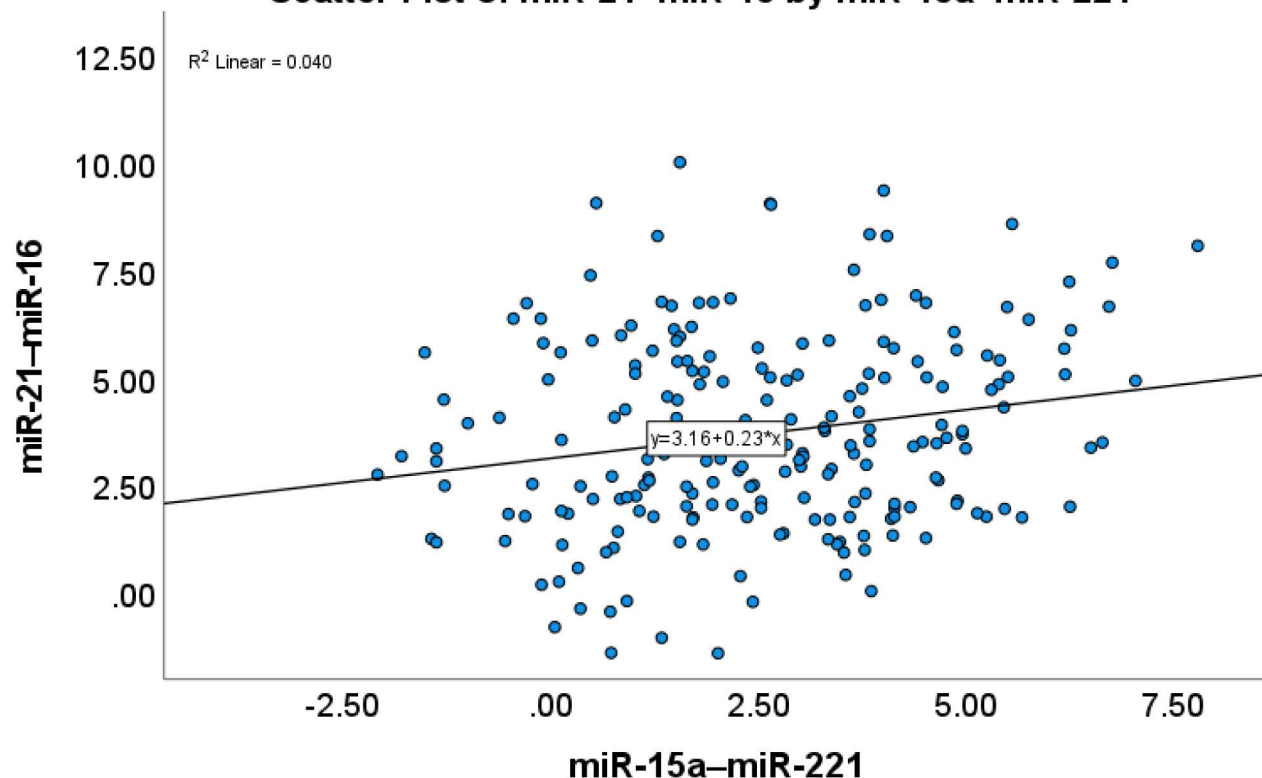

**Figure S3 Pearson correlation analysis and the related scatter plot performed on miR-15a–miR-16 and miR-21–miR-221.** Pearson correlation coefficient, p- and n-values are depicted in the correlation table.



A

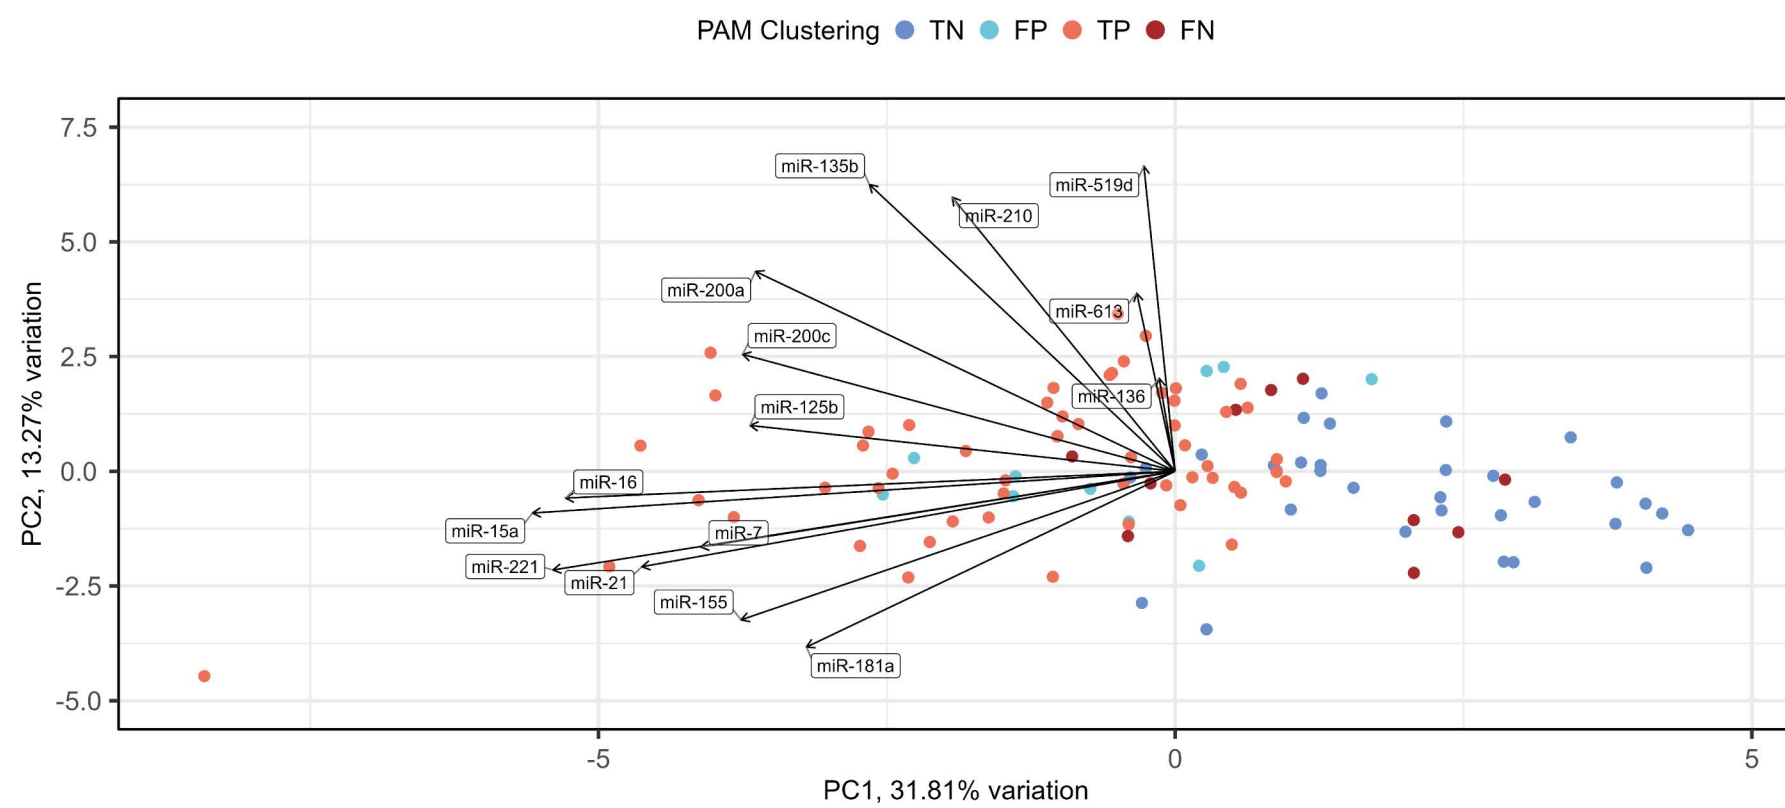

B

|                  |    | Actual values |    |
|------------------|----|---------------|----|
|                  |    | BC            | C  |
| Predicted values | BC | 55            | 10 |
|                  | C  | 10            | 32 |

C

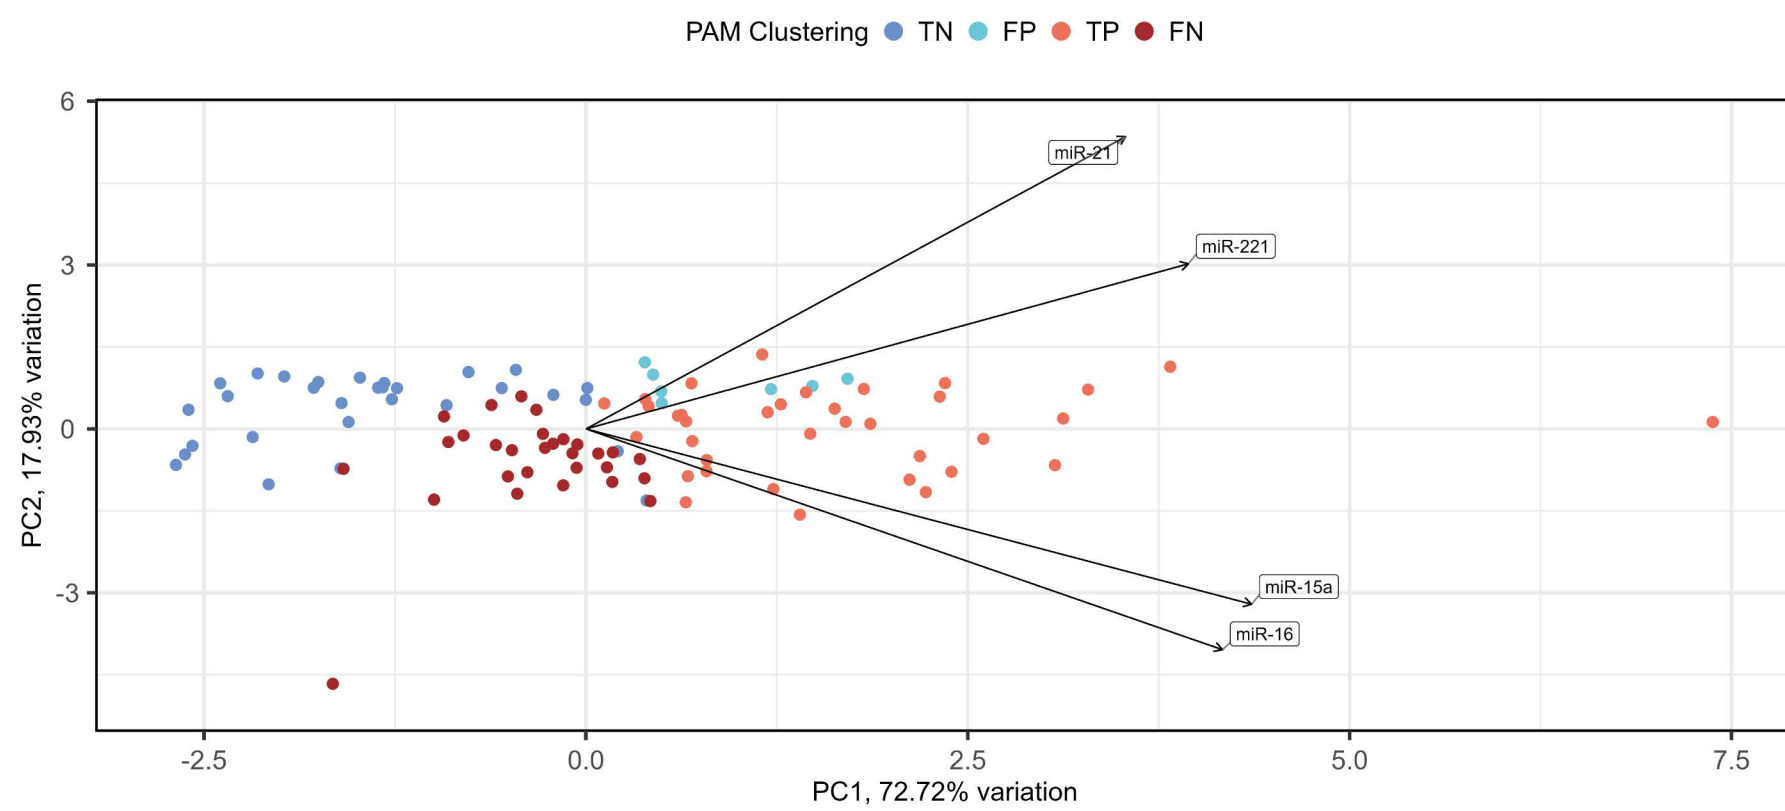

D

|                  |    | Actual values |    |
|------------------|----|---------------|----|
|                  |    | BC            | C  |
| Predicted values | BC | 36            | 7  |
|                  | C  | 29            | 35 |

E

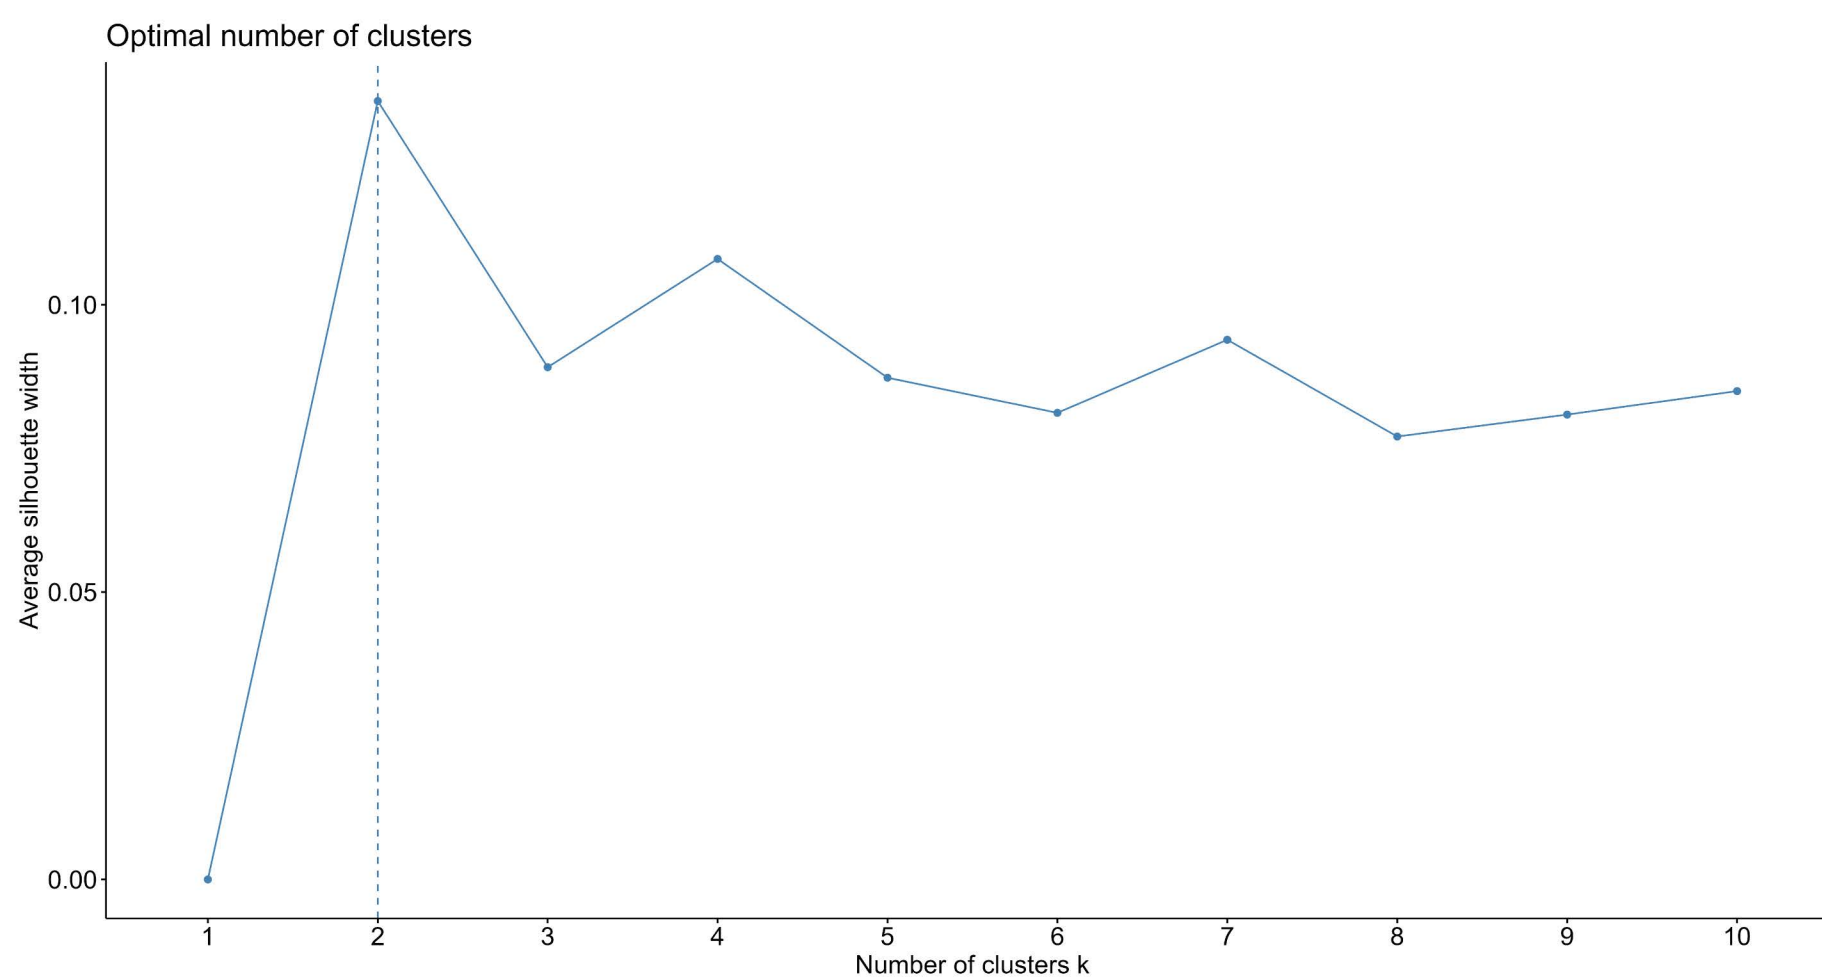

**Figure S4 Principal component analysis (PCA) and confusion matrix of data derived from BC patients and healthy individuals. A)** and **C)** PCA plots display the clustering data of **(A)** all miRNAs and **(C)** miR-15a+miR-16+miR-21+miR-221, concerning the first two principal components (PC1 and PC2). The following eigenvale clustering was applied: true positive (TP), true negative (TN), false positive (FP), and false negative (FN). **B)** and **D)** Confusion matrixes represent the number of TP, TN, FP, and FN prediction values of **(B)** all miRNAs and **(D)** miR-15a+miR-16+miR-21+miR-221. TP, TN, FP, and FN refer to the following outcomes, respectively: where the model (I) correctly predicts the BC patients; (II) correctly predicts the healthy individuals; (III) incorrectly predicts the BC patients when they are actually healthy individuals; and (IV) incorrectly predicts the healthy individuals when they are actually BC patients. **E)** displays the optimal number of clusters determined by the Silhouette method.

|          | Fwd primer 5'-3'         |
|----------|--------------------------|
| miR-125b | GCAGTCCCTGAGACCCT        |
| miR-7    | TGGAAGACTAGTGATTTTGTTG   |
| miR-15a  | CAGTAGCAGCACATAATGGT     |
| miR-16   | TAGCAGCACGTAAATATTGG     |
| miR-21   | TAGCTTATCAGACTGATGTTGA   |
| miR-200c | AGTAATACTGCCGGGTAATGA    |
| miR-210  | GCTGTGCGTGTGACA          |
| miR-155  | CGCAGTTAATGCTAATCGTGATAG |
| miR-181a | CATTCAACGCTGTCGGT        |
| miR-613  | GGAATGTTTCCTTCTTTGCC     |
| miR-519d | AGCAAAGTGCCTCCCT         |
| miR-221  | AGCTACATTGTCTGCTGGG      |
| miR-200a | CAGTAACACTGTCTGGTAACG    |
| miR-135b | GCAGTATGGCTTTTTCATTCCT   |
| miR-136  | CGCAGCATCATCGTCTCA       |
| U6       | CTCGCTTCGGCAGCACATA      |

Table S1 Primer sequences of miRNAs used for qPCR reactions

|          | BC (n) | C (n) | p-value | t-value | df      |
|----------|--------|-------|---------|---------|---------|
| miR-15a  | 65     | 42    | <0.001  | 9.32    | 105     |
| miR-16   | 65     | 42    | <0.001  | 10.748  | 105     |
| miR-21   | 63     | 42    | <0.001  | 3.479   | 103     |
| miR-125b | 55     | 36    | <0.001  | 5.664   | 89      |
| miR-200a | 65     | 38    | <0.001  | 5.203   | 101     |
| miR-221  | 65     | 41    | <0.001  | 3.561   | 104     |
| miR-613  | 65     | 38    | <0.001  | -4.268  | 100.119 |
| miR-135b | 65     | 41    | 0.005   | 2.645   | 104     |
| miR-136  | 62     | 42    | 0.007   | -2.506  | 101.755 |
| miR-200c | 65     | 42    | 0.005   | 2.671   | 70.673  |
| miR-519d | 65     | 42    | 0.011   | 2.328   | 105     |
| miR-7    | 54     | 40    | 0.077   | 1.439   | 92      |
| miR-155  | 62     | 39    | 0.376   | 0.316   | 99      |
| miR-181  | 60     | 41    | 0.101   | 1.287   | 99      |
| miR-210  | 59     | 40    | 0.064   | 1.543   | 73.144  |

|                                | BC (n) | C (n) | p-value | t-value | df      |
|--------------------------------|--------|-------|---------|---------|---------|
| miR-15a+miR-16                 | 129    | 84    | <0.001  | 11.828  | 211     |
| miR-16+miR-15a+miR-221         | 195    | 126   | <0.001  | 9.091   | 319     |
| miR-16+miR-15a+miR-21+miR-221  | 259    | 168   | <0.001  | 10.215  | 413.858 |
| miR-135b+miR-200a+miR-200c     | 195    | 126   | <0.001  | 6.269   | 228.422 |
| miR-15a+miR-16+miR-200a        | 195    | 122   | <0.001  | 4.177   | 216.241 |
| miR-15a+miR-16+miR-21+miR-125b | 260    | 167   | <0.001  | 6.531   | 400.263 |
| miR-21+miR-221                 | 129    | 84    | <0.001  | 4.993   | 152.08  |
| miR-21+miR-181a+miR-221        | 187    | 126   | <0.001  | 5.009   | 311     |

Table S2 n-, p-, and t-values as well as degrees of freedom (df) of independent t-tests executed on individual or multiple miRNAs



| Category        | Subcategory                                  | Enrichment       | P-value   | P-adjusted | Q-value   | Expected   | Observed | miRNAs/precursors                                                                                           |
|-----------------|----------------------------------------------|------------------|-----------|------------|-----------|------------|----------|-------------------------------------------------------------------------------------------------------------|
| Diseases (MNDR) | breast ductal carcinoma                      | over-represented | 7.49E-06  | 3.77E-05   | 3.77E-05  | 0.156897   | 4        | hsa-miR-15a-5p; hsa-miR-16-5p; hsa-miR-21-5p; hsa-miR-125b-5p                                               |
| Diseases (MNDR) | triple-receptor negative breast cancer       | over-represented | 0.0022656 | 0.0036319  | 0.0036319 | 0.075431   | 2        | hsa-miR-15a-5p; hsa-miR-21-5p                                                                               |
| Diseases (MNDR) | breast cancer                                | over-represented | 0.0023197 | 0.0036904  | 0.0036904 | 2.94784    | 7        | hsa-miR-15a-5p; hsa-miR-16-5p; hsa-miR-21-5p; hsa-miR-221-5p; hsa-miR-200a-5p; hsa-miR-613; hsa-miR-125b-5p |
| Diseases (MNDR) | breast ductal carcinoma                      | over-represented | 0.0032011 | 0.0044421  | 0.0044421 | 1.2944     | 5        | hsa-miR-15a-5p; hsa-miR-16-5p; hsa-miR-21-5p; hsa-miR-200a-5p; hsa-miR-125b-5p                              |
| Diseases (MNDR) | female breast carcinoma                      | over-represented | 0.0060267 | 0.0077963  | 0.0077963 | 0.00603448 | 1        | hsa-miR-125b-5p                                                                                             |
| Diseases (MNDR) | breast fibroadenoma                          | over-represented | 0.0120222 | 0.0145934  | 0.0145934 | 0.012069   | 1        | hsa-miR-125b-5p                                                                                             |
| Diseases (MNDR) | estrogen-receptor positive breast cancer     | over-represented | 0.0120222 | 0.0145934  | 0.0145934 | 0.012069   | 1        | hsa-miR-125b-5p                                                                                             |
| Diseases (MNDR) | Her2-receptor positive breast cancer         | over-represented | 0.0138767 | 0.0167477  | 0.0167477 | 1.78319    | 5        | hsa-miR-15a-5p; hsa-miR-16-5p; hsa-miR-21-5p; hsa-miR-221-5p; hsa-miR-125b-5p                               |
| Diseases (MNDR) | breast disease                               | over-represented | 0.0150083 | 0.0177396  | 0.0177396 | 0.0150862  | 1        | hsa-miR-125b-5p                                                                                             |
| Diseases (MNDR) | breast malignant phyllodes tumor             | over-represented | 0.0150083 | 0.0177396  | 0.0177396 | 0.0150862  | 1        | hsa-miR-21-5p                                                                                               |
| Diseases (MNDR) | progesterone-receptor negative breast cancer | over-represented | 0.0175598 | 0.0203806  | 0.0203806 | 1.87974    | 5        | hsa-miR-15a-5p; hsa-miR-16-5p; hsa-miR-21-5p; hsa-miR-221-5p; hsa-miR-125b-5p                               |
| Diseases (MNDR) | sporadic breast cancer                       | over-represented | 0.0209573 | 0.023327   | 0.023327  | 0.0211207  | 1        | hsa-miR-125b-5p                                                                                             |
| Diseases (MNDR) | progesterone-receptor positive breast cancer | over-represented | 0.0234293 | 0.0259867  | 0.0259867 | 2.00647    | 5        | hsa-miR-15a-5p; hsa-miR-16-5p; hsa-miR-21-5p; hsa-miR-221-5p; hsa-miR-125b-5p                               |
| Diseases (MNDR) | Breast Neoplasms                             | over-represented | 0.0313749 | 0.0339625  | 0.0339625 | 2.14526    | 5        | hsa-miR-15a-5p; hsa-miR-16-5p; hsa-miR-21-5p; hsa-miR-221-5p; hsa-miR-125b-5p                               |

**Table S3 miRNAs shown to be involved in breast cancer based on miRNA enrichment analysis and annotation tool (miEAA)**
